# Supplementary material for: Evaluation of the acceptability of a vaccine against herpes zoster in the over 50 years old: an Italian observational study
Source: PubMed Central journal article supplement — BMJ Open. 2016 Oct 18;6(10):e011539. doi: 10.1136/bmjopen-2016-011539 (PMC5073480; doi:10.1136/bmjopen-2016-011539), 2016-10-18
Supplement: bmjopen-2016-011539supp.pdf [file bmjopen-2016-011539supp.pdf]

**Evaluation of the acceptability of a vaccine against Herpes Zoster in the over 50 years old population.**

**Date** \_\_-\_\_-\_\_\_\_

Thanks for agreeing to participate in the study. The information contained in this form will be kept confidential under the legislation (Legislative Decree no. 196/2003 “Code regarding the protection of personal data”).

**1. Gender**  M  F

**2. Age** \_\_\_\_\_

**3. Nationality** \_\_\_\_\_

**4. City of residence** \_\_\_\_\_

**5. Educational level**

No qualification

Primary school

Secondary school

High school

University

**6. Employment status**

Retired

Worker

**7. Do you know the disease called Varicella?**

No

Yes

**8. Have you had Varicella in the past?**

No

Yes

I do not remember

**9. If yes, how old were you?** \_\_\_\_\_

**10. Have you been vaccinated against Varicella?**

No

Yes

I do not remember

**11. If yes, how old were you ?**    I do not remember

---

**12. Do you know the disease called shingles (Herpes Zoster)?**

No

Yes

*(if you answer "no" to question number 12 the interview ends here)*

**13. Do you know someone who had shingles (Herpes Zoster)?**

No

Yes

**14. Do you had shingles in the past (Herpes Zoster)?**

No

Yes

**15. If yes, how old were you?**    I do not remember

**16. In your opinion what are the consequences of shingles (Herpes Zoster)?**

*(multiple choice question: you can give more than one answer)*

- |                                        |                                  |
|----------------------------------------|----------------------------------|
| <input type="checkbox"/> Pain          | <input type="checkbox"/> Rash    |
| <input type="checkbox"/> Headache      | <input type="checkbox"/> Itching |
| <input type="checkbox"/> Eye problems  | <input type="checkbox"/> Malaise |
| <input type="checkbox"/> I do not know |                                  |

**17. In your opinion, the pain associated to shingles (Herpes Zoster) is:**

- Mild, with duration of few days
- Moderate, with duration of few weeks
- Serious, with a term of months or years
- I do not know

**18. In your opinion, the chronic pain associated to shingles can have an impact on the normal activities of daily life activities:**

- Little relevance
- Relevant
- Very relevant
- I do not know

**19. Are you aware about the vaccine against shingles?**

- No
- Yes

**20. If you have answered yes to the previous question, how it came to knowledge?**

*(multiple choice question: you can give more than one answer)*

- |                                               |                                                    |
|-----------------------------------------------|----------------------------------------------------|
| <input type="checkbox"/> General Practitioner | <input type="checkbox"/> Internet                  |
| <input type="checkbox"/> Family               | <input type="checkbox"/> TV                        |
| <input type="checkbox"/> Friends/ contacts    | <input type="checkbox"/> Books/brochures/magazines |
| <input type="checkbox"/> Radio                | <input type="checkbox"/> Other (specify) _____     |

**21. Do you think that vaccines are an effective tool for prevention?**

- No
- Yes

**22. Would you vaccinate against shingles?**

- No
- Yes

**23. If you would not vaccinate against shingles, why? (multiple choice question: you can give more than one answer)**

- I do not think of being at high risk of having the disease
- I have trouble to go to the doctor for vaccination
- In general, I am opposed to vaccinations
- I think that vaccination is not completely effective
- I fear the possible side effects of vaccination (eg, immune system disorders)
- I do not think that the disease is particularly harmful, long or painful
- Other (specify) \_\_\_\_\_

**24. If your GP would recommend the vaccine against shingles, would you vaccinate?**

- No  Yes

**25. If yes, why?** (*multiple choice question: you can give more than one answer*)

- I think the vaccine is effective  
 I think I can have the diseases  
 I knew someone who had the shingles and I do not want that it happen to me  
 I think the vaccine can improve my health  
 Other (specify).....

**26. Are you in favor of being immunized against HZ even upon payment?**

- No  Yes

**27. How much would you pay for the vaccine against shingles?**

- Up to 50 euro  
 Up to 100 euro  
 Up to 150 euro  
 Other (specify).....

Thanks for your collaboration
